# Supplementary material for: Prevalence of Adverse Skin Reactions in Nursing Staff Due to Personal Protective Equipment during the COVID-19 Pandemic
Source: MDPI journal article supplement (doi:10.3390/ijerph191912530), 2022-10-01
Supplement: s1 [file s1]

Table S1. Bivariate analyses – factors influencing new facial ASR (n = 1967)

| Variable [missing value]                 | New ASR |      | No ASR |      | OR [95% CI]    | p-value |
|------------------------------------------|---------|------|--------|------|----------------|---------|
|                                          | n       | %    | n      | %    |                |         |
| <b>FFP mask wearing time</b>             |         |      |        |      |                |         |
| ≥ 4 hours                                | 985     | 58.7 | 692    | 41.3 | 1.4 [1.1; 1.8] | 0.008   |
| < 4 hours                                | 146     | 50.3 | 146    | 49.7 | 1              | -       |
| <b>Surgical mask wearing time (1295)</b> |         |      |        |      |                |         |
| ≥ 4 hours                                | 252     | 59.3 | 173    | 40.7 | 1.1 [0.8; 1.5] | 0.575   |
| < 4 hours                                | 141     | 57.1 | 106    | 42.9 | 1              | -       |
| <b>Years in profession (4)</b>           |         |      |        |      |                |         |
| < 1 year                                 | 25      | 62.5 | 15     | 37.5 | 1.5 [0.8; 2.9] | 0.211   |
| ≥ 1 year - < 20 years                    | 572     | 63.1 | 335    | 36.9 | 1.6 [1.3; 1.9] | <0.001  |
| ≥ 20 years                               | 532     | 52.4 | 484    | 47.6 | 1              | -       |
| <b>Area at work (2)</b>                  |         |      |        |      |                |         |
| Hospital                                 | 694     | 58.6 | 490    | 41.4 | 1.2 [0.9; 1.5] | 0.277   |
| Inpatient geriatric care                 | 173     | 57.1 | 130    | 42.9 | 1.1 [0.8; 1.5] | 0.630   |
| Outpatient geriatric care                | 166     | 55.1 | 135    | 44.9 | 1              | -       |
| Other                                    | 98      | 55.4 | 79     | 44.6 | 1.0 [0.7; 1.5] | 0.963   |
| <b>Employment type (5)</b>               |         |      |        |      |                |         |
| Full time                                | 665     | 59.1 | 461    | 40.9 | 1.2 [1.0; 1.4] | 0.128   |
| Part time                                | 465     | 55.6 | 371    | 44.4 | 1              | -       |
| <b>Contact allergy</b>                   |         |      |        |      |                |         |
| Yes                                      | 266     | 61.6 | 166    | 38.4 | 1.2 [1.0; 1.5] | 0.053   |
| No                                       | 865     | 56.4 | 670    | 43.6 | 1              | -       |
| <b>Pre-existing skin disease</b>         |         |      |        |      |                |         |
| Yes                                      | 184     | 52.0 | 170    | 48.0 | 0.8 [0.6; 1.0] | 0.021   |
| No                                       | 947     | 58.7 | 666    | 41.3 | 1              | -       |
| <b>Age</b>                               |         |      |        |      |                |         |
| ≤29 years                                | 178     | 68.2 | 83     | 31.8 | 2.9 [2.0; 4.3] | <0.001  |
| 30-39 years                              | 276     | 65.9 | 143    | 34.1 | 2.6 [1.8; 3.7] | <0.001  |
| 40-49 years                              | 256     | 57.7 | 188    | 42.3 | 1.9 [1.3; 2.6] | 0.001   |
| 50-59 years                              | 343     | 52.0 | 316    | 48.0 | 1.5 [1.1; 2.1] | 0.021   |
| ≥ 60 years                               | 78      | 42.4 | 106    | 57.6 | 1              | -       |
| <b>Sex</b>                               |         |      |        |      |                |         |
| Female                                   | 978     | 61.0 | 625    | 39.0 | 2.2 [1.7; 2.7] | <0.001  |
| Male                                     | 153     | 42.0 | 211    | 58.0 | 1              | -       |
| <b>Gender and age (male)</b>             |         |      |        |      |                |         |
| ≤29 years                                | 14      | 31.1 | 31     | 68.9 | 0.8 [0.3; 2.1] | 0.606   |
| 30-39 years                              | 49      | 51.6 | 46     | 48.4 | 1.8 [0.8; 4.4] | 0.185   |
| 40-49 years                              | 40      | 44.4 | 50     | 55.6 | 1.4 [0.6; 3.3] | 0.496   |
| 50-59 years                              | 40      | 37.4 | 67     | 62.6 | 1.0 [0.4; 2.4] | 0.973   |
| ≥ 60 years                               | 10      | 37.0 | 17     | 63.0 | 1              | -       |
| <b>Gender and age (female)</b>           |         |      |        |      |                |         |
| ≤29 years                                | 164     | 75.9 | 52     | 24.1 | 4.1 [2.7; 6.4] | <0.001  |
| 30-39 years                              | 227     | 70.1 | 97     | 29.9 | 3.1 [2.1; 4.6] | <0.001  |
| 40-49 years                              | 216     | 61.0 | 138    | 39.0 | 2.1 [1.4; 3.0] | <0.001  |
| 50-59 years                              | 303     | 54.9 | 249    | 45.1 | 1.6 [1.1; 2.3] | 0.011   |
| ≥ 60 years                               | 68      | 43.3 | 89     | 56.7 | 1              | -       |
